# Supplementary material for: Eruption plumes extended more than 30 km in altitude in both phases of the Millennium eruption of Paektu (Changbaishan) volcano
Source: Springer Nature journal article supplement (doi:10.1038/s43247-023-01162-0), 2024-01-02
Supplement: 43247_2023_1162_MOESM2_ESM.pdf [file 43247_2023_1162_MOESM2_ESM.pdf]

**Supplementary Table 1.** Tephra thicknesses reported in the literature for the Millennium eruption deposits.

| Label | Location            | Latitude | Longitude | Thickness (cm) | Reference                                       | Comendite phase (cm) | Trachyte phase (cm) |
|-------|---------------------|----------|-----------|----------------|-------------------------------------------------|----------------------|---------------------|
| P01   | S67-J17             | 42.000   | 130.283   | 9              | Machida & Arai (2003)                           |                      |                     |
| P02   | St. 6913            | 41.333   | 130.417   | 10             | Machida & Arai (1983)                           |                      |                     |
| P03   | St. 6920            | 40.283   | 132.217   | 5              | Machida & Arai (1983)                           |                      |                     |
| P04   | KH69-2-25           | 40.867   | 132.65    | 4              | Machida & Arai (1983)                           |                      |                     |
| P05   | S67-13              | 40.767   | 133.2     | 9              | Machida & Arai (2003)                           |                      |                     |
| P06   | KH69-2-23           | 41.35    | 134.435   | 16             | Machida & Arai (1983);<br>Machida & Arai (2003) | 10.88                | 5.12                |
| P07   | P128                | 40.017   | 136.398   | 10             | Machida & Arai (2003)                           |                      |                     |
| P08   | P129                | 40.745   | 136.938   | 0.1            | Machida & Arai (1983)                           |                      |                     |
| P09   | KH77-3-M5           | 41.005   | 137.018   | 8              | Machida & Arai (1983)                           |                      |                     |
| P10   | KH79-3-C2           | 41.873   | 137.657   | 11             | Machida & Arai (1983)                           |                      |                     |
| P11   | GH89-4-20-2         | 41.147   | 138.002   | 9              | Machida & Arai (2003)                           |                      |                     |
| P12   | KH84-3-11           | 41.423   | 138.26    | 7.4            | Machida & Arai (2003)                           |                      |                     |
| P13   | V28-271             | 40.75    | 138.45    | 2              | Machida & Arai (1983)                           |                      |                     |
| P14   | GH89-2-19           | 40.952   | 138.667   | 11             | Machida & Arai (2003)                           |                      |                     |
| P15   | P130                | 41.998   | 138.668   | 3              | Machida & Arai (1983)                           | 1.74                 | 1.26                |
| P16   | GH89-4-35           | 40.898   | 139.015   | 6              | Machida & Arai (2003)                           |                      |                     |
| P17   | KH84-3-9            | 41.833   | 139.163   | 3.2            | Machida & Arai (2003)                           |                      |                     |
| P18   | P82                 | 40.895   | 142.278   | 0.2            | Machida & Arai (1983)                           |                      |                     |
| P19   | P83                 | 40.678   | 142.783   | 0.2            | Machida & Arai (1983)                           |                      |                     |
| P20   | t* (Sea of Japan)   | 42.633   | 141.567   | 2              | Machida & Arai (1983)                           |                      |                     |
| P21   | Tomakomai Port      | 42.767   | 141.6     | 1              | Machida & Arai (1983)                           | 0.86                 | 0.14                |
| P22   | near Toya           | 42.466   | 140.55    | 1              | Machida & Arai (1983)                           |                      |                     |
| P23   | n* (Sea of Japan)   | 42.183   | 140.667   | 4              | Machida & Arai (1983)                           |                      |                     |
| P24   | l* (Sea of Japan)   | 41.883   | 141.083   | 5              | Machida & Arai (1983)                           |                      |                     |
| P25   | k* (Sea of Japan)   | 41.516   | 140       | 4              | Machida & Arai (1983)                           | 2.84                 | 1.16                |
| P26   | u* (Sea of Japan)   | 40.3     | 141.333   | 5              | Machida & Arai (1983)                           |                      |                     |
| P27   | o* (Sea of Japan)   | 40.483   | 140.483   | 4              | Machida & Arai (1983)                           |                      |                     |
| P28   | Kurili              | 46.71    | 151.66    | 1.5            | Razjigaeva et al. (2020)                        |                      |                     |
| P29   | Russkij Isalnd      | 42.996   | 131.847   | 3              | Razjigaeva et al. (2020)                        |                      |                     |
| P30   | Shkotovskoe Plateau | 43.393   | 132.795   | 2              | Razjigaeva et al. (2020)                        |                      |                     |
| P31   | Sergeevskoe Plateau | 43.504   | 133.382   | 1.5            | Razjigaeva et al. (2020)                        |                      |                     |

|     |                        |        |         |          |                         |         |         |
|-----|------------------------|--------|---------|----------|-------------------------|---------|---------|
| P32 | Muta Area              | 43.522 | 134.144 | 1        | Razjgaeva et al. (2020) |         |         |
| P33 | Suigetsu, Japan        | 35.583 | 135.883 | 0.1      | McLean et al. (2016)    | 0.097   | 0.003   |
| P34 | Kiritappu, Hokkaido    | 43.078 | 145.101 | 1        | Nanayama et al. (2003)  | 1.00    | 0.00    |
| P35 | RK12-0151 (Lake Kushu) | 45.007 | 145.001 | 0.00144* | Chen et al. (2019)      | 0.00094 | 0.0005  |
| P36 | Sihailongwan, China    | 42.283 | 126.6   | 0.00256* | Sun et al. (2015)       | 0.00041 | 0.00215 |
| P37 | Ichi-no-Megata         | 39.955 | 139.739 | 0.2      | Okuno et al. (2011)     | 0.097   | 0.103   |
| P38 | Utasai Bog, Hokkaido   | 42.633 | 140.307 | 4        | Hughes et al. (2013)    | 2.16    | 1.84    |
| P39 | Shiriuchi              | 41.63  | 140.427 | 3        | Nakanishi et al. (2020) |         |         |
| P40 | Hinohama               | 41.781 | 141.1   | 4        | Nakanishi et al. (2020) |         |         |
| P41 | Todohokke              | 41.838 | 141.139 | 4        | Nakanishi et al. (2020) |         |         |
| P42 | Hanaura                | 42.301 | 140.271 | 2        | Nakanishi et al. (2020) |         |         |
| P43 | Yamazaki               | 42.319 | 140.274 | 2        | Nakanishi et al. (2020) |         |         |
| P44 | Nakanosawa             | 42.484 | 140.353 | 1        | Nakanishi et al. (2020) |         |         |
| P45 | Oshamanbe              | 42.537 | 140.399 | 1        | Nakanishi et al. (2020) |         |         |
| P46 | Kyoritsu               | 42.555 | 140.42  | 1        | Nakanishi et al. (2020) |         |         |
| P47 | Arutori                | 42.503 | 140.798 | 2        | Nakanishi et al. (2020) |         |         |
| P48 | Kogane                 | 42.395 | 140.911 | 1        | Nakanishi et al. (2020) |         |         |
| P49 | Wakayama               | 42.386 | 141.076 | 1        | Nakanishi et al. (2020) |         |         |
| P50 | Tomiura                | 42.44  | 141.151 | 1        | Nakanishi et al. (2020) |         |         |
| P51 | Shadai                 | 42.56  | 141.376 | 1        | Nakanishi et al. (2020) |         |         |
| P52 | Atsuma                 | 42.617 | 141.782 | 1        | Nakanishi et al. (2020) |         |         |
| P53 | Taura                  | 42.581 | 141.905 | 3        | Nakanishi et al. (2020) |         |         |
| P54 | Shiomi                 | 42.555 | 141.939 | 1        | Nakanishi et al. (2020) |         |         |
| P55 | Monbetsu               | 42.484 | 142.046 | 3        | Nakanishi et al. (2020) |         |         |
| P56 | Toyosato               | 42.473 | 142.118 | 2        | Nakanishi et al. (2020) |         |         |
| P57 | Kabari                 | 42.448 | 142.196 | 2        | Nakanishi et al. (2020) |         |         |
| P58 | Urawa                  | 42.309 | 142.432 | 3        | Nakanishi et al. (2020) |         |         |
| P59 | Higashisizunai         | 42.304 | 142.454 | 2        | Nakanishi et al. (2020) |         |         |
| P60 | Harutachi              | 42.266 | 142.513 | 2        | Nakanishi et al. (2020) |         |         |
| P61 | Kerimai W              | 42.228 | 142.614 | 2        | Nakanishi et al. (2020) |         |         |
| P62 | Kerimai E              | 42.217 | 142.642 | 1        | Nakanishi et al. (2020) |         |         |
| P63 | Efue                   | 42.192 | 142.723 | 3        | Nakanishi et al. (2020) |         |         |
| P64 | Utoma                  | 42.137 | 142.86  | 4        | Nakanishi et al. (2020) |         |         |
| P65 | Nishisamani            | 42.137 | 142.91  | 1        | Nakanishi et al. (2020) |         |         |
| P66 | Tomabetsu              | 41.99  | 143.245 | 4        | Nakanishi et al. (2020) |         |         |

|      |                             |         |         |        |                                                 |             |      |
|------|-----------------------------|---------|---------|--------|-------------------------------------------------|-------------|------|
| P67  | Syoya                       | 41.998  | 143.253 | 5      | Nakanishi et al. (2020)                         |             |      |
| P68  | Gushantun Peat              | 42.306  | 126.283 | 0.01   | Zhao and Liu, 2012;<br>Zhao et al., 2015        | 0.01        | 0.00 |
| P69  | Sea of Japan                | 40.53   | 132.2   | 5      | Furuta et al. (1986);<br>Machida and Arai, 1983 | 3.30        | 1.70 |
| P70  | Asahidake Volcano           | 43.65   | 142.85  | 1      | Wada et al. (2001)                              | 0.73        | 0.27 |
| P71  | Sapporo archaeological Site | 43.067  | 141.35  | 0.1    | Nakamura (2016)                                 | 0.08        | 0.02 |
| P72  | Tyatya Volcano, Kuril Arc   | 44.351  | 146.256 | 1      | Nakagawa et al. (2002)                          | 1.00        | 0.00 |
| P73  | Lake Ogawara                | 40.783  | 141.317 | 2      | Fukusawa et al. (1988)                          | 0.77        | 1.23 |
| P74  | 13PT_P4 Ulleung Basin core  | 37.0144 | 130.266 | 0.038* | Chen et al. (2022)                              | 0.038       | 0    |
| P75  | Komaga-take volcano         | 42.082  | 140.688 | 5      | Wei et al. (2013)                               |             |      |
| P76  | Tumen River                 | 42.014  | 128.42  | 100    | Pan et al. (2020)                               |             |      |
| P77  | Tianwenfeng peak            | 42.02   | 128.069 | 150    | Chen et al. (2016); Sun et al. (2017)           | 35          | 115  |
| P78  | Heishi River                | 42.05   | 128.242 | 60     | Pan et al. (2020)                               | 10          | 50   |
| P79  | Yuanchi                     | 41.998  | 128.539 | 72     | Pan et al. (2020) <sup>§</sup>                  | 26          | 46   |
| P80  | Site 1, Fig. 12             | 42.011  | 128.423 | 90     | Pan et al. (2020)                               | 50          | 40   |
| P81  | Site 2, Fig. 12             | 42.033  | 128.421 | 50     | Pan et al. (2020)                               | 10          | 40   |
| P82  | Site 4, Fig. 12             | 42.074  | 128.416 | 50     | Pan et al. (2020)                               | 0.00        | 50   |
| P83  | Site 5, Fig. 12             | 42.113  | 128.376 | 20     | Pan et al. (2020)                               | Not exposed | 20   |
| Vent |                             | 42.006  | 128.055 | -      | -                                               |             |      |

Footnote: \*These tephra layers are not visible and reported as shard concentrations. Thicknesses have been estimated for these layers assuming 25,000 shards/gram = 1 mm thickness, which is based on thickness and shard concentration in Lake Suigetsu (McLean et al., 2016). <sup>§</sup>Chen et al. (2016) and Sun et al. (2017) glass chemistry show that Pan et al. (2020) assignment of the units (comendite vs trachyte) is not correct for the Tianwenfeng peak location, and that colour of the deposit can be used as a good measure of the composition. We can clearly see a light grey unit, followed by a slightly darker deposit at Yuanchi and have reduced Pan et al. (2020) thickness of the comendite from 45 cm to 26 cm (based on relative thickness on the photo in the paper) and extended the thickness of the trachytic deposit by 19 cm.

Tephra thicknesses from terrestrial exposures and marine and lake cores were used to model the tephra dispersal from the two phases of the Millennium Eruption. The reliability of core tephra data has been the focus of studies by Engwell et al., (2014) and Freundt et al. (2021). These studies identified that the accuracy of the thickness and bulk granulometry of these core deposits depends on various parameters relating to the coring and the setting but indicate that these core records are commonly more reliable than those on-land (Engwell et al., 2014, Freundt et al., 2021).

## Supplementary References

1. Chen, X.-Y., Blockley, S.P., Tarasov, P.E., Xu, Y.G., McLean, D., Tomlinson, E.L., Albert, P.G., Liu, J.Q., Müller, S., Wagner, M. and Menzies, M.A. (2016) Clarifying the distal to proximal tephrochronology of the Millennium (B–Tm) eruption, Changbaishan Volcano, northeast China. *Quat Geochronol* **33**, 61-75.
2. Chen, X.-Y., Blockley, S. P. E., Fletcher, R., Zhang, S., Kim, J.-H., Park, M.-H., Chen, C., Yin, J., Yu Y.-G. (2022). Holocene tephrostratigraphy in the East Sea/Japan Sea: Implications for eruptive history of Ulleungdo volcano and potential for hemispheric synchronization of sedimentary archives. *J. Geophys. Res. Solid Earth* **127**: e2021JB023243
3. Fukusawa, H., Tsukamoto, S., Tsukamoto, H., Ikeda, M., Okamura, M. & Matsuoka, M. (1998) Falling age of Baegdusan-Tomakomai tephra (B-Tm) estimated by using non-glacial varves. *Laguna* **5**, 55-62.
4. Furuta, T., Fujioka, K. & Arai, F. (1986) Widespread submarine tephra around Japan- Petrographic and chemical properties. *Mar. Geol.* **72**, 125-142.
5. Hughes, P.D.M., Mallon, G., Brown, A., Essex, H.J., Stanford, J.D. & Hotes, S. (2013) The impact of high tephra loading on late-Holocene carbon accumulation and vegetation succession in peatland communities. *Quat. Sci. Rev.* **67**, 160-175.
6. Machida H, Arai F (1983) Extensive ash falls in and around the Sea of Japan from large late Quaternary eruptions. *J Volcanol Geotherm Res* **18** (1-4):151–164
7. Machida, H. and Arai, F., 2003, Atlas of tephra in and around Japan [Revised Edition]. University of Tokyo Press, Tokyo, 336p.
8. McLean, D., Albert, P.G., Nakagawa, T., Staff, R., Suzuki, T., Suigetsu 2006 Project Members and Smith, V.C., (2016) Identification of the Changbaishan 'Millennium' (B-Tm) eruption deposit in the Lake Suigetsu (SG06) sedimentary archive, Japan: synchronisation of hemispheric-wide palaeoclimate archives. *Quat Sci Rev* **150**: 301–307, doi:10.1016/j.quascirev.2016.08.022
9. Nakagawa, M., Ishizuka, Y., Kudo, T., Yoshimoto, M., Hirose, W., Ishizaki, Y., Gouchi, N., Katsui, Y., Solovyow, A.W., Steinberg, G.S. & Abdurakhmanov, A.I. (2002) Tyatya volcano, southwestern Kuril arc: recent eruptive activity inferred from widespread tephra. *Isl. Arc* **11**, 236-254.
10. Nakamura, Y. (2016) Stratigraphy, distribution, and petrographic properties of Holocene tephra in Hokkaido, northern Japan. *Quat. Int.* **397**, 52-62.
11. Nakanishi, R., Okamura, S., Yokoyama, Y., Miyairi, Y., Sagayama, T. & Ashi, J. (2020) Holocene tsunami, storm, and relative sea level records obtained from the southern Hidaka coast, Hokkaido, Japan. *Quat. Sci. Rev.* **250**, 106678.
12. Nanayama, F., Satake, K., Furukawa, R., Shimokawa, K., Atwater, B.F., Shigeno, K. and Yamaki, S., (2003), Unusually large earthquakes inferred from tsunami deposits along the Kuril trench. *Nature* **424**: 660-663.
13. Okuno, M., Torii, M., Yamada, K., Shinozuka, Y., Danhara, T., Gotanda, K., Yonenobu, H. & Yasuda, Y. (2011) Widespread tephra in sediments from Lake Ichi-no-Megata in northern Japan: their description, correlation and significance. *Quat. Int.* **246**: 270-277.
14. Pan, B., de Silva, S.L., Xu, J., Liu, S. and Xu, D., (2020) Late Pleistocene to present day eruptive history of the Changbaishan-Tianchi Volcano china/DPRK: New field, geochronological and chemical constraints. *J Volcanol Geotherm Res* **399**: 106870
15. Razjigaeva, N.G., Ganzey, L.A., Makarova, T.R., Korniyushenko, T.V., Ganzei, K.S., Sudin, V.V. & Kharlamov, A.A. (2020) Paleolake of Shkot Island (Peter the Great Gulf): Natural archives of climatic and landscape vegetation, *Geosyst. Transition Zones* **4**, 230–249. (In Russ.)
16. Sun, C., You, H., He, H., Zhang, L., Gao, J., Guo, W., Chen, S., Mao, Q., Liu, Q., Chu, G. & Liu, J. (2015) New evidence for the presence of Changbaishan Millennium eruption ash in the Longgang volcanic field, Northeast China. *Gondwana Res.* **28**, 52-60.
17. Sun, C., Liu, J., You, H., Németh, K., (2017) Tephrostratigraphy of Changbaishan volcano, northeast China, since the mid-Holocene. *Quat. Sci. Rev.* **177**, 104–119.
18. Wada, K., Nakamura, M. & Okuno, M. (2001) Identification of source volcano from the chemical Compositions of glasses from the widespread ashes in the surface layers of Asahidake volcano, Central Hokkaido, Japan. *Rep. Taisetsuzan Inst. Sci.* **35**, 9-18 . (In Japanese)
19. Wei, H., Liu, G. & Gill, J. (2013) Review of eruptive activity at Tianchi volcano, Changbaishan, northeast China: implications for possible future eruptions. *Bull Volcanol*, **75**, 760, 1-14.
20. Zhao, H.L., Liu, J.Q. (2012) Cryptotephra discovered in Gushantun peat of the China and its significance. *Seismol and Geol* **34**: 516–530 (in Chinese).
21. Zhao, H.L., Li, X.Q., Hall, V.A. (2015) Holocene vegetation change in relation to fire and volcanic events in Jilin, Northeastern China. *Sci. China Earth Sci.* **58**, 1404–1419.

22. Engwell, S.L., Sparks, R.S.J., Carey, S. (2014) *Physical characteristics of tephra layers in the deep sea realm: the Campanian Ignimbrite eruption*. In: Marine Tephrochronology. Austin W.E.N., Abbott P.M., Davies S.M., Pearce N.J.G., Wastegard S (eds), vol. Geological Society, London, Special Publications, p 398, 47–64.
23. Freundt, A., Schindlbeck-Belo, J.C., Kutterolf, S., Hopkins, J. L. (2023) *Tephra layers in the marine environment: a review of properties and emplacement processes*. In: Volcanic Processes in the Sedimentary Record: When Volcanoes Meet the Environment. Di Capua, A., De Rosa, R., Kereszturi, G., Le Pera, E., Rosi, M. Watt, S. F. L. (eds). Geological Society, London, Special Publications, 520.

Supplementary Table 2:

| Meteorological configuration for the comendite phase | Meteorological configuration for the trachyte phase | RMSE         | BIAS         | MAE          | SMAPE         | CR (68.67% band) | CI (RMSE+BIAS+MAE+CR+SMAPE/100) |
|------------------------------------------------------|-----------------------------------------------------|--------------|--------------|--------------|---------------|------------------|---------------------------------|
| 19680930-19681004                                    | 19680930-19681004                                   | 1.228        | 0.779        | 0.944        | 47.528        | 4.130            | 7.556                           |
| 19680930-19681004                                    | 19751008-19751012                                   | 1.321        | 0.815        | 0.995        | 48.485        | 4.880            | 8.496                           |
| 19680930-19681004                                    | 19781129-19781203                                   | 1.154        | 0.643        | 0.841        | 39.412        | 3.710            | 6.742                           |
| 19680930-19681004                                    | 19860923-19860927                                   | 1.166        | 0.666        | 0.859        | 39.631        | 3.370            | 6.457                           |
| 19680930-19681004                                    | 19921030-19921103                                   | 1.156        | 0.655        | 0.845        | 39.195        | 3.130            | 6.178                           |
| 19680930-19681004                                    | 19940421-19940425                                   | 1.139        | 0.645        | 0.863        | 44.376        | 4.720            | 7.811                           |
| 19751008-19751012                                    | 19680930-19681004                                   | 1.270        | 0.825        | 0.949        | 45.813        | 4.520            | 8.022                           |
| 19751008-19751012                                    | 19751008-19751012                                   | 1.411        | 0.861        | 1.055        | 51.754        | 7.540            | 11.384                          |
| 19751008-19751012                                    | 19781129-19781203                                   | 1.246        | 0.689        | 0.914        | 42.921        | 3.820            | 7.098                           |
| 19751008-19751012                                    | 19860923-19860927                                   | 1.219        | 0.712        | 0.889        | 39.650        | 3.410            | 6.625                           |
| 19751008-19751012                                    | 19921030-19921103                                   | 1.227        | 0.701        | 0.902        | 41.908        | 3.330            | 6.579                           |
| 19751008-19751012                                    | 19940421-19940425                                   | 1.218        | 0.691        | 0.940        | 48.792        | 5.000            | 8.336                           |
| 19781129-19781203                                    | 19680930-19681004                                   | 1.101        | 0.551        | 0.822        | 37.873        | 3.110            | 5.963                           |
| 19781129-19781203                                    | 19751008-19751012                                   | 1.242        | 0.588        | 0.918        | 41.879        | 3.430            | 6.597                           |
| 19781129-19781203                                    | 19781129-19781203                                   | 1.158        | 0.415        | 0.870        | 38.961        | 3.040            | 5.873                           |
| 19781129-19781203                                    | 19860923-19860927                                   | 1.117        | 0.438        | 0.850        | 37.793        | 2.680            | 5.463                           |
| 19781129-19781203                                    | 19921030-19921103                                   | 1.127        | 0.427        | 0.852        | 38.056        | 2.640            | 5.427                           |
| 19781129-19781203                                    | 19940421-19940425                                   | 1.102        | 0.417        | 0.854        | 40.227        | 3.060            | 5.835                           |
| 19860923-19860927                                    | 19680930-19681004                                   | 1.037        | 0.526        | 0.772        | 34.650        | 2.470            | 5.151                           |
| 19860923-19860927                                    | 19751008-19751012                                   | 1.157        | 0.563        | 0.853        | 36.966        | 2.570            | 5.513                           |
| <b><u>19860923-19860927</u></b>                      | <b><u>19781129-19781203</u></b>                     | 1.052        | <b>0.390</b> | 0.785        | <b>33.924</b> | 2.380            | 4.946                           |
| 19860923-19860927                                    | 19860923-19860927                                   | 1.056        | 0.413        | 0.781        | 35.580        | 2.390            | 4.996                           |
| <b><u>19860923-19860927</u></b>                      | <b><u>19921030-19921103</u></b>                     | 1.053        | 0.402        | 0.779        | 34.580        | <b>2.170</b>     | <b>4.751</b>                    |
| <b><u>19860923-19860927</u></b>                      | <b><u>19940421-19940425</u></b>                     | <b>1.005</b> | <b>0.392</b> | <b>0.766</b> | 35.273        | 2.480            | 4.996                           |
| 19921030-19921103                                    | 19680930-19681004                                   | 1.045        | 0.541        | 0.780        | 35.721        | 2.630            | 5.353                           |
| 19921030-19921103                                    | 19751008-19751012                                   | 1.171        | 0.578        | 0.872        | 39.718        | 2.920            | 5.938                           |
| 19921030-19921103                                    | 19781129-19781203                                   | 1.054        | 0.405        | 0.799        | 35.930        | 2.500            | 5.118                           |
| <u>19921030-19921103</u>                             | <u>19860923-19860927</u>                            | 1.048        | 0.428        | 0.787        | 35.469        | 2.200            | 4.818                           |
| 19921030-19921103                                    | 19921030-19921103                                   | 1.053        | 0.417        | 0.793        | 36.828        | 2.350            | 4.981                           |
| 19921030-19921103                                    | 19940421-19940425                                   | 1.020        | 0.407        | 0.790        | 38.272        | 2.740            | 5.339                           |
| 19940421-19940425                                    | 19680930-19681004                                   | 1.137        | 0.646        | 0.863        | 44.366        | 4.660            | 7.749                           |
| 19940421-19940425                                    | 19751008-19751012                                   | 1.281        | 0.683        | 0.991        | 51.841        | 5.610            | 9.083                           |
| 19940421-19940425                                    | 19781129-19781203                                   | 1.154        | 0.510        | 0.889        | 43.394        | 3.560            | 6.546                           |
| 19940421-19940425                                    | 19860923-19860927                                   | 1.071        | 0.533        | 0.831        | 39.327        | 2.950            | 5.778                           |
| 19940421-19940425                                    | 19921030-19921103                                   | 1.092        | 0.522        | 0.848        | 42.091        | 3.160            | 6.042                           |
| 19940421-19940425                                    | 19940421-19940425                                   | 1.219        | 0.512        | 0.966        | 50.767        | 5.810            | 9.014                           |

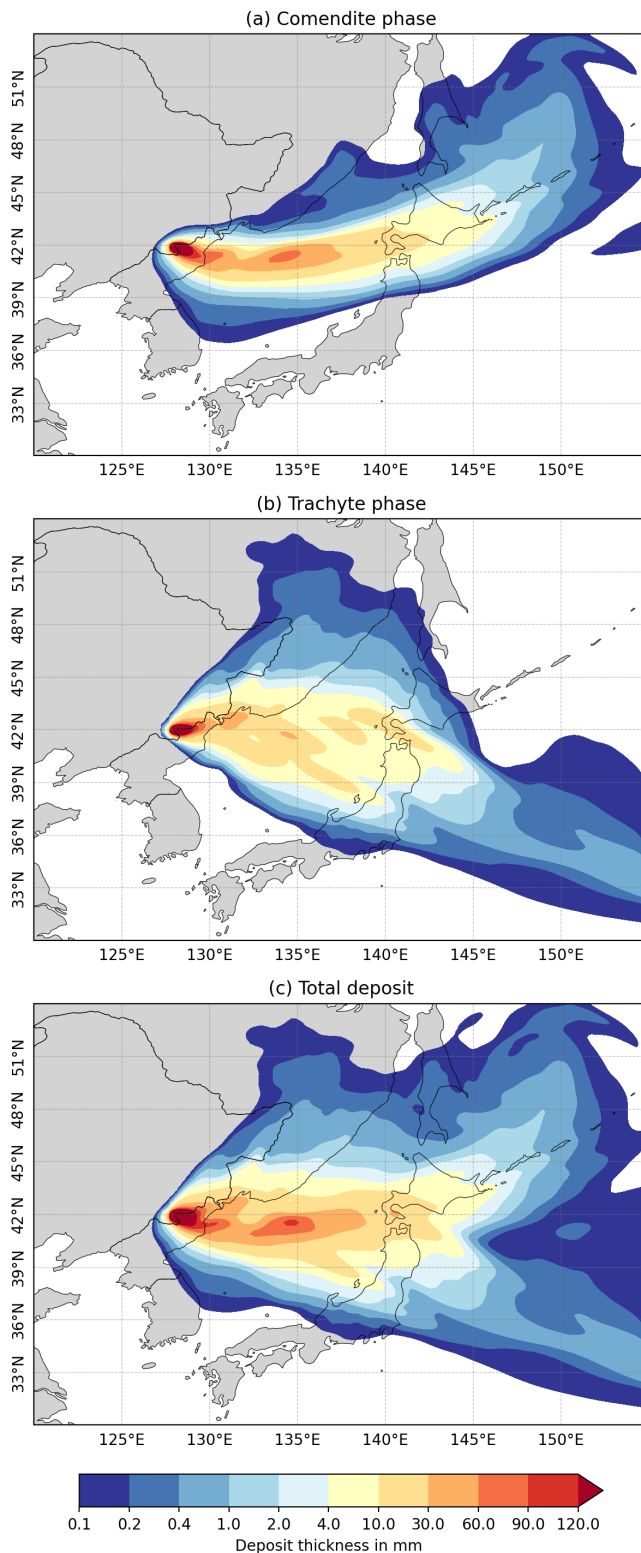

**Supplementary Figure 1.** Reconstructed deposit thickness contours for the comendite (a), trachyte (b) eruptive phases, and for the total deposit (c) of the Millennium Eruption (ME), for the simulations using the meteorological condition of 23 September 1986 for the comendite phase and 21 April 1994 for the trachyte phase. The maps were created using the open software “Cartopy: a cartographic python library with a matplotlib interface” (<https://scitools.org.uk/cartopy/docs/latest/index.html>).

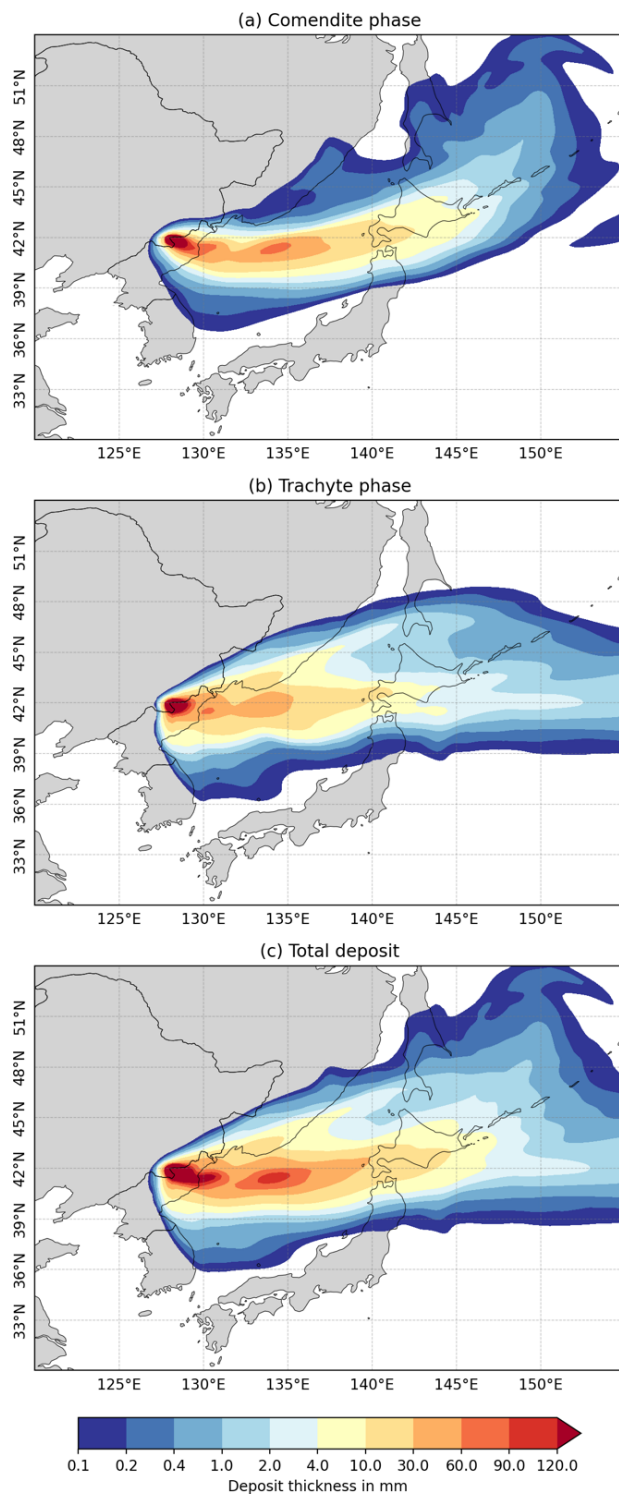

**Supplementary Figure 2.** Reconstructed deposit thickness contours for the comendite (a), trachyte (b) eruptive phases, and for the total deposit (c) of the Millennium Eruption (ME), for the simulations using the meteorological condition of 23 September 1986 for the comendite phase and 29 November 1978 for the trachyte phase. The maps were created using the open software “Cartopy: a cartographic python library with a matplotlib interface” (<https://scitools.org.uk/cartopy/docs/latest/index.html>).



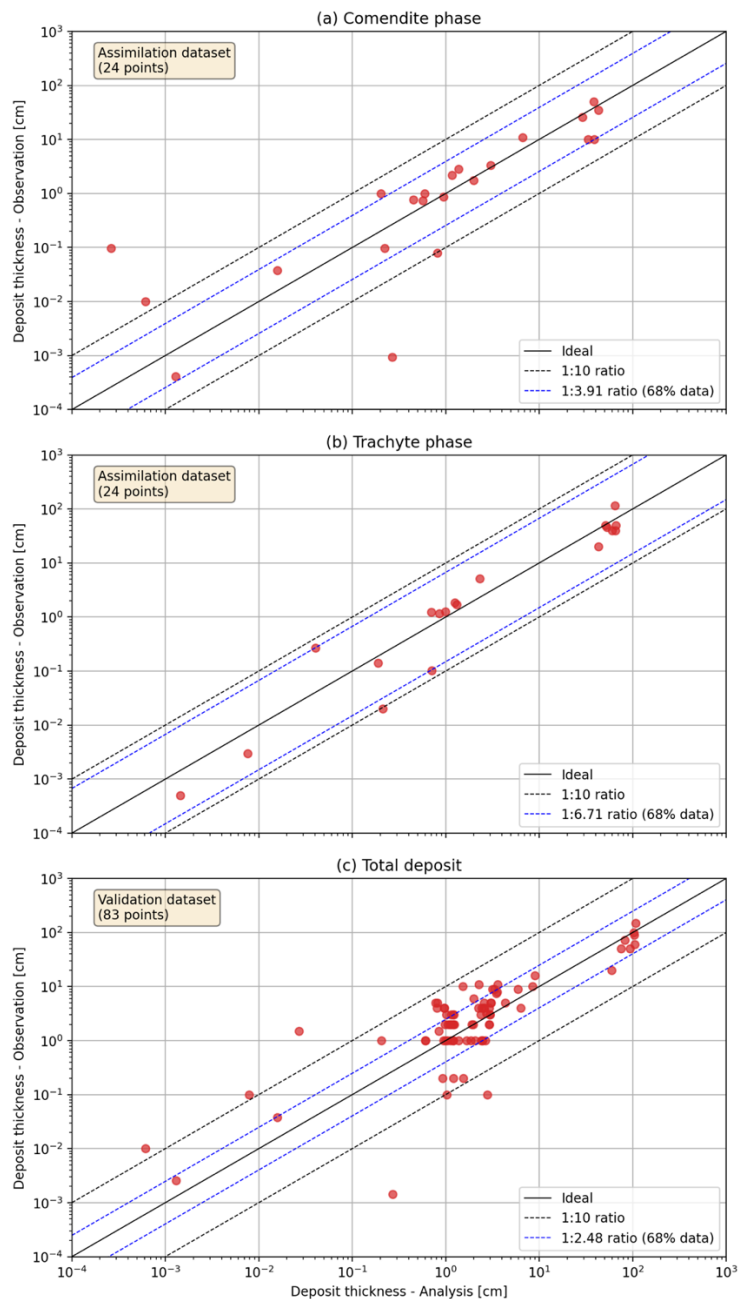

**Supplementary Figure 3.** Quantitative comparison between observed and modelled (analysis) deposit thickness of the comendite (a) and trachyte (b) eruptive phases of the Millennium Eruption (ME) using the assimilation dataset (23 measurements for each eruptive phase). In addition, the comparison between the total deposit thickness and the validation dataset (83 measurements) is also shown (c), for the simulations using the meteorological condition of 23 September 1986 for the comendite phase and 21 April 1994 for the trachyte phase. The plots were created using the open software Matplotlib (<https://matplotlib.org/stable/>).

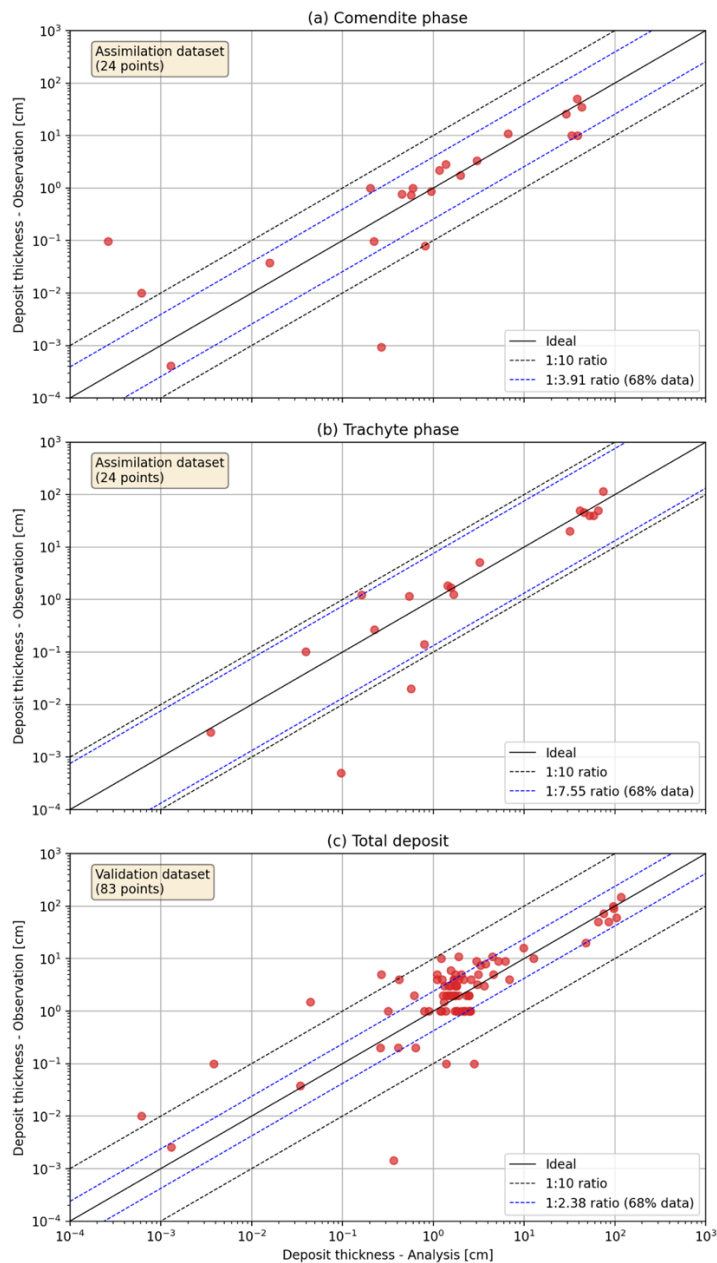

**Supplementary Figure 4.** Quantitative comparison between observed and modelled (analysis) deposit thickness of the comendite (a) and trachyte (b) eruptive phases of the Millennium Eruption (ME) using the assimilation dataset (23 measurements for each eruptive phase). In addition, the comparison between the total deposit thickness and the validation dataset (83 measurements) is also shown (c), for the simulations using the meteorological condition of 23 September 1986 for the comendite phase and 23 September 1986 for the comendite phase and 29 November 1978 for the trachyte phase. The plots were created using the open software Matplotlib (<https://matplotlib.org/stable/>).

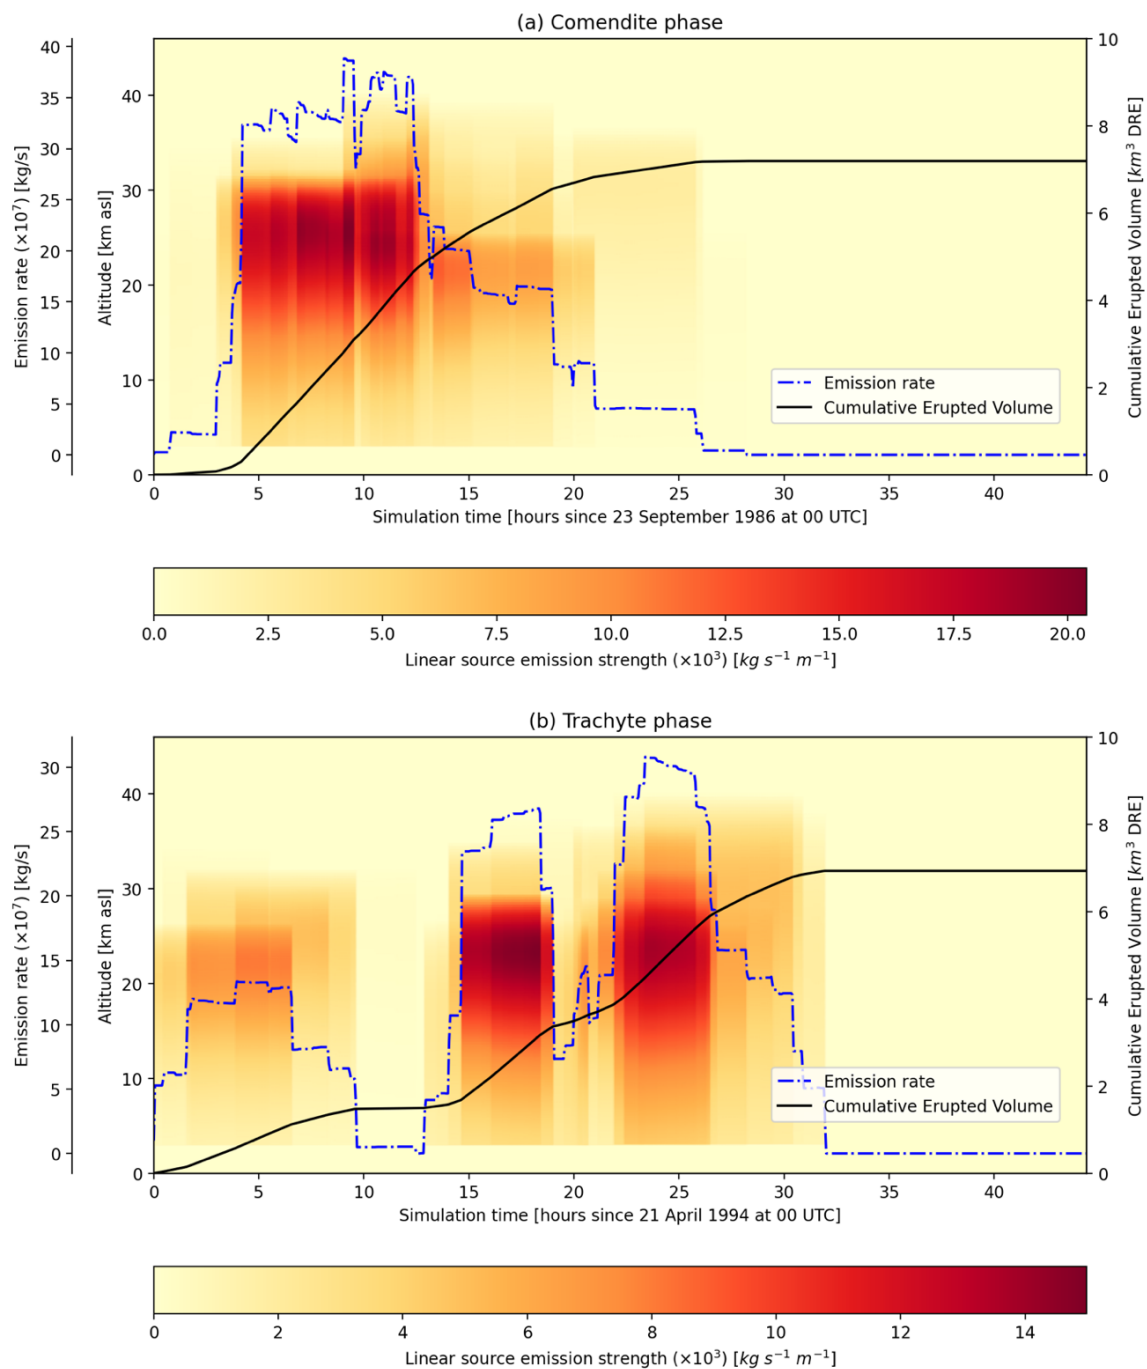

**Supplementary Figure 5.** Time evolution of the emission source profiles derived for the comenditic first phase (a) and trachytic phase (b) of the Millennium Eruption (ME), for the simulations using the meteorological condition of 23 September 1986 for the comendite phase and 21 April 1994 for the trachyte phase. The plots were created using the open software Matplotlib (<https://matplotlib.org/stable/>).

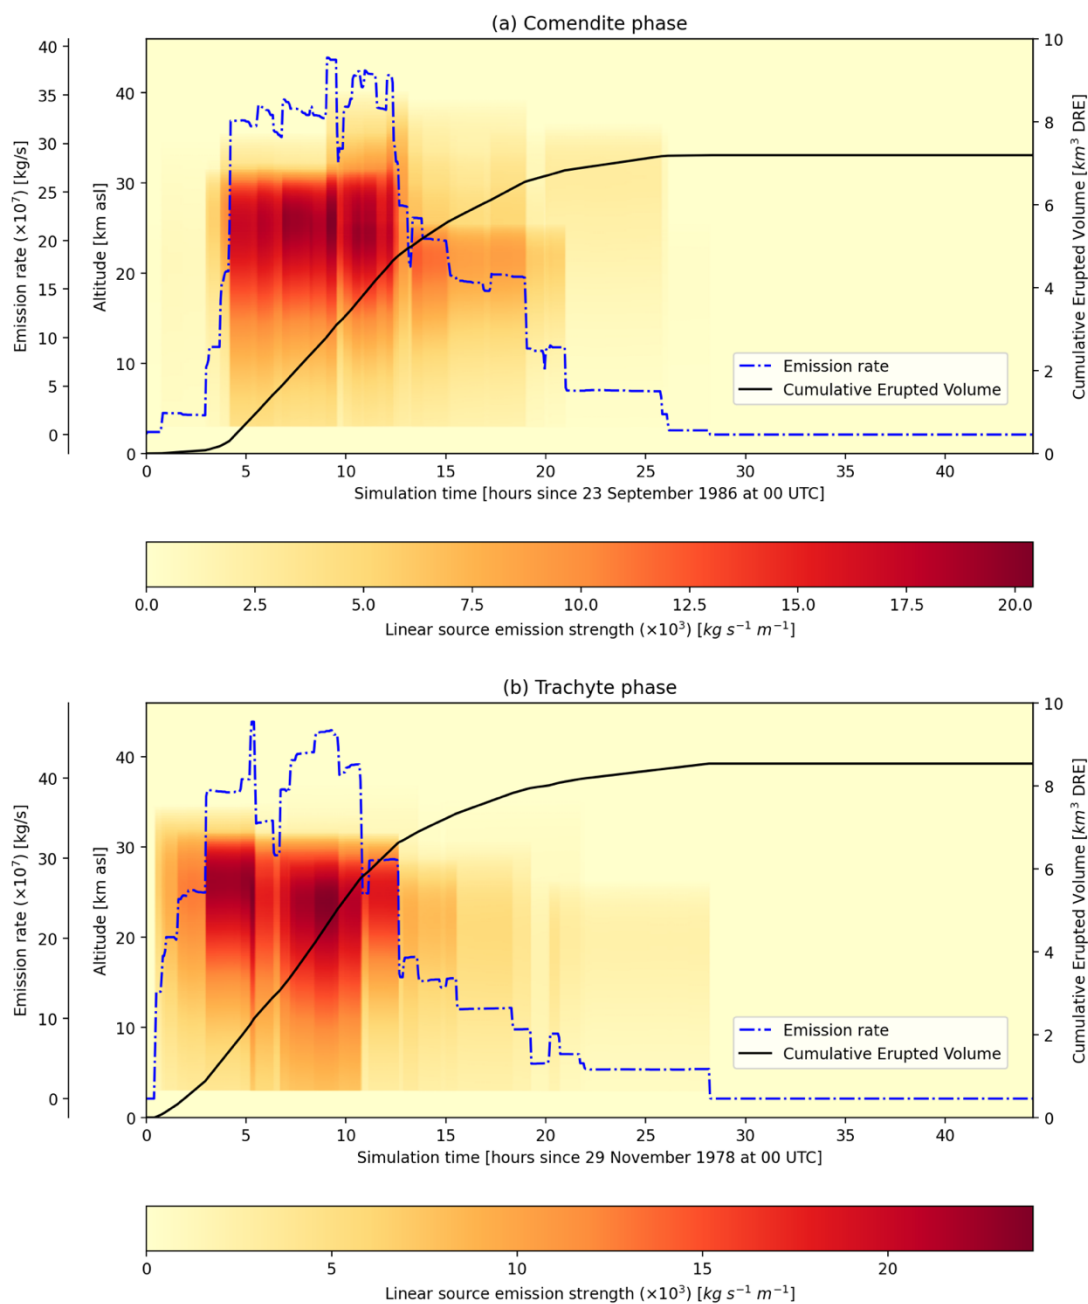

**Supplementary Figure 6.** Time evolution of the emission source profiles derived for the comenditic first phase (a) and trachytic phase (b) of the Millennium Eruption (ME), for the simulations using the meteorological condition of 23 September 1986 for the comendite phase and 29 November 1978 for the trachyte phase. The plots were created using the open software Matplotlib (<https://matplotlib.org/stable/>).
